# Supplementary material for: The alignment between phenotypic plasticity, the major axis of genetic variation and the response to selection
Source: PubMed Central journal article supplement (PMC4614775; doi:10.1098/rspb.2015.1651), 2015-10-07
Supplement: rspb20151651supp1.pdf [file rspb20151651supp1.pdf]

## Supplementary materials

Lind MI, Yarlett K, Reger J, Carter MC and AP Beckerman (2015) The alignment between phenotypic plasticity, the major axis of genetic variation and the response to selection *Proc. R. Soc. B: Biol. Sci.*

**Below is presented the microsatellite markers and methodology, followed by supplementary tables 1-10 and supplementary figures 1-4**

### Microsatellite markers and methodology

All clones in this study were screened at 10 polymorphic microsatellite markers developed by Cristescu et al. (2006) and Stapley et al. (unpublished). All DNA extractions were performed from whole adults by placing individual females in a 1.5 ml flip-top tube with 50 µl buffer (made up of 10 mM Tris-Cl pH 8.2, 1 mM EDTA and 25 mM NaCl) and 4 µl proteinase K, followed by an incubation period of one hour at 55°C and finally three minutes at 80°C to denature the proteinase K. Allelic variation was assessed using the following neutral markers arranged in three, 2 µl Qiagen Multiplex reactions: (i) Dp802; Dp1236, Dp1290; (ii) Dpu122, Dp1079, Dp675; and (iii) Dp1123, Dp45, Dp460, Dp43. We used a touchdown PCR to lower nonspecific amplification (for details see Cristescu et al. 2006). Amplified products were genotyped in an ABI 3730 48-well capillary DNA Analyser (Applied Biosystems) and allele sizes were scored using GENEMAPPER v3.7 software (Applied Biosystems).

Note: The microsatellite analyses were performed by Julia Reger and are presented in her PhD. Thesis (Reger 2012).

### References

Cristescu, M. E. A., J. K. Colbourne, J. Radivojac, and M. Lynch. 2006. A microsatellite-based genetic linkage map of the waterflea, *Daphnia pulex*: On the prospect of crustacean genomics. *Genomics* 88:415–430.

Reger, J. 2012. The quantitative genetic basis of inducible defences and life-history plasticity in *Daphnia pulex*. Ph. D. Thesis. University of Sheffield, Department of Animal and Plant Sciences, Sheffield, United Kingdom.

Supplementary table 1. Pond names, locations, some physical and biological characteristics and the number of genotypes identified per pond.

| Pond     | Location  | Coordinates                          | pH   | Vegetation | Cover | No. genotypes |
|----------|-----------|--------------------------------------|------|------------|-------|---------------|
| LD3      | Cumbria   | 54°20'39.8791"N,<br>002°50'53.9422"W | 8.50 | Heavy      | Light | 5             |
| LD6      | Cumbria   | 54°20'51.8643"N,<br>002°53'07.1089"W | 8.46 | Present    | Light | 7             |
| Crabtree | Yorkshire | 53°24'18.4949"N,<br>001°27'27.7570"W | 8.62 | Heavy      | Light | 7             |

Supplementary table 2. Clone mean  $\pm$  SE of traits in both predator cue treatments.

| Trait             | Treatment | Trait mean $\pm$ SE                   |
|-------------------|-----------|---------------------------------------|
| Age at maturity   | Fish      | 6.88 $\pm$ 0.18 days                  |
|                   | Midge     | 6.90 $\pm$ 0.13 days                  |
| Size at maturity  | Fish      | 1.68 $\pm$ 0.02 mm                    |
|                   | Midge     | 1.86 $\pm$ 0.02 mm                    |
| Adult growth rate | Fish      | 0.0378 $\pm$ 0.0032 day <sup>-1</sup> |
|                   | Midge     | 0.0327 $\pm$ 0.0025 day <sup>-1</sup> |

Supplementary table 3. Heritability ( $h^2$ ), the genetic variance-covariance matrix (**G**) and genetic correlations between age at maturity, size at maturity and adult growth rate traits in the fish and midge cue treatment. Presented are the posterior mode and 95% highest posterior density (HPD) intervals estimated by MCMC. The **G** matrix is presented in bold, with genetic variance as diagonal elements, and genetic covariance as off-diagonal elements. Genetic correlations are presented as off-diagonal elements above the **G** matrix with non-zero estimates indicated by asterisks (\*).

| <b>Fish</b>   | $h^2$                 | Age maturity                     | Size maturity                    | Adult growth                 |
|---------------|-----------------------|----------------------------------|----------------------------------|------------------------------|
| Age maturity  | 0.533* (0.305; 0.761) | <b>0.530* (0.239; 1.549)</b>     | 0.603* (0.029; 0.827)            | -0.586 (-0.823; 0.038)       |
| Size maturity | 0.598* (0.373; 0.784) | <b>0.152 (-0.053; 0.561)</b>     | <b>0.352* (0.133; 0.695)</b>     | -0.850* (-0.964; -0.485)     |
| Adult growth  | 0.695* (0.461; 0.825) | <b>-0.284 (-0.820; 0.121)</b>    | <b>-0.330* (-0.837; -0.129)</b>  | <b>0.657* (0.327; 1.517)</b> |
| <b>Midge</b>  | $h^2$                 | Age maturity                     | Size maturity                    | Adult growth                 |
| Age maturity  | 0.332* (0.039; 0.600) | <b>0.171* (&lt;0.001; 0.738)</b> | -0.371 (-0.843; 0.281)           | 0.360 (-0.271; 0.773)        |
| Size maturity | 0.302* (0.039; 0.551) | <b>-0.039 (-0.255; 0.096)</b>    | <b>0.106* (&lt;0.001; 0.492)</b> | -0.600* (-0.900; -0.060)     |
| Adult growth  | 0.460* (0.267; 0.724) | <b>0.099 (-0.126; 0.354)</b>     | <b>-0.117 (-0.464; 0.024)</b>    | <b>0.316* (0.136; 0.869)</b> |

Supplementary table 4. Eigendecomposition of **G** into constituent eigenvalues with cumulative variance explained and their corresponding eigenvectors and trait loadings in the fish and midge cue treatment.

|               | Fish   |        |        | Midge  |        |        |
|---------------|--------|--------|--------|--------|--------|--------|
| Eigenvalue    | 1.127  | 0.450  | 0.120  | 0.415  | 0.125  | 0.053  |
| Cumm. expl.   | 66.40% | 26.54% | 7.06%  | 69.95% | 21.08% | 8.97%  |
|               | 1      | 2      | 3      | 1      | 2      | 3      |
| Age maturity  | -0.503 | 0.830  | -0.239 | 0.400  | 0.915  | -0.052 |
| Size maturity | -0.475 | -0.035 | 0.880  | -0.369 | 0.212  | 0.905  |
| Adult growth  | 0.722  | 0.556  | 0.412  | 0.839  | -0.342 | 0.423  |

Supplementary table 5. The linear selection gradient  $\beta$ , the matrix of non-linear selection gradients,  $\gamma$ , and eigenvalues ( $m_i$ ) and their corresponding eigenvectors from a canonical rotation of  $\gamma$ . Significant components of  $\beta$ ,  $\gamma$  and significant eigenvalues after permutation are indicated by an asterisk (\*).

| <b>Fish</b>   |         | $\gamma$ -matrix |               |              | $m_i$ | $\gamma_i$ | Age maturity | Size maturity | Adult growth |
|---------------|---------|------------------|---------------|--------------|-------|------------|--------------|---------------|--------------|
| Trait         | $\beta$ | Age maturity     | Size maturity | Adult growth |       |            |              |               |              |
| Age maturity  | -0.762* | 0.256            |               |              | $m_1$ | 0.195      | 0.915        | -0.228        | -0.334       |
| Size maturity | 0.547*  | -0.222           | -0.271        |              | $m_2$ | -0.008     | 0.137        | -0.602        | 0.787        |
| Adult growth  | 0.595*  | -0.218           | -0.157        | 0.099        | $m_3$ | -0.244     | -0.380       | -0.765        | -0.519       |

  

| <b>Midge</b>  |         | $\gamma$ -matrix |               |              | $m_i$ | $\gamma_i$ | Age maturity | Size maturity | Adult growth |
|---------------|---------|------------------|---------------|--------------|-------|------------|--------------|---------------|--------------|
| Trait         | $\beta$ | Age maturity     | Size maturity | Adult growth |       |            |              |               |              |
| Age maturity  | -0.743* | 0.341            |               |              | $m_1$ | 0.257      | 0.854        | -0.501        | 0.139        |
| Size maturity | 0.515*  | -0.247           | 0.151         |              | $m_2$ | 0.188*     | 0.188        | 0.547         | 0.816        |
| Adult growth  | 0.472*  | 0.174            | 0.208         | 0.196        | $m_3$ | -0.101     | -0.485       | -0.671        | 0.562        |

Supplementary table 6. One-tailed p values after permutation for the linear selection gradient  $\beta$ , the matrix of non-linear selection gradients,  $\gamma$  and eigenvalues ( $m_i$ ) from a canonical rotation of  $\gamma$ .

| <b>Fish</b>   |         | $\gamma$ -matrix |               |              |     |       |            |  |
|---------------|---------|------------------|---------------|--------------|-----|-------|------------|--|
| Trait         | $\beta$ | Age maturity     | Size maturity | Adult growth | DVM | $m_i$ | $\gamma_i$ |  |
| Age maturity  | >0.999* | 0.050            |               |              |     | $m_1$ | 0.674      |  |
| Size maturity | <0.001* | 0.872            | 0.800         |              |     | $m_2$ | 0.560      |  |
| Adult growth  | <0.001* | 0.911            | 0.813         | 0.664        |     | $m_3$ | 0.455      |  |

| <b>Midge</b>  |         | $\gamma$ -matrix |               |              |     |       |            |  |
|---------------|---------|------------------|---------------|--------------|-----|-------|------------|--|
| Trait         | $\beta$ | Age maturity     | Size maturity | Adult growth | DVM | $m_i$ | $\gamma_i$ |  |
| Age maturity  | >0.999* | 0.036            |               |              |     | $m_1$ | 0.496      |  |
| Size maturity | <0.001* | 0.973            | 0.296         |              |     | $m_2$ | 0.020      |  |
| Adult growth  | <0.001* | 0.108            | 0.186         | 0.262        |     | $m_3$ | 0.136      |  |

Supplementary table 7. The trait-specific coefficients for the composite selection gradients. Each gradient is standardized to a length of 1.

| Treatment | Trait            | $\beta_R$ | $\beta_R+0.5\beta_S$ | $\beta_R+ \beta_S$ | $0.5\beta_R+ \beta_S$ | $\beta_S$ |
|-----------|------------------|-----------|----------------------|--------------------|-----------------------|-----------|
| Fish      | Age at maturity  | -0.686    | -0.788               | -0.681             | -0.394                | 0.000     |
|           | Size at maturity | 0.492     | -0.009               | -0.504             | -0.866                | -1.000    |
|           | Adult growth     | 0.536     | 0.616                | 0.532              | 0.308                 | 0.000     |
| Midge     | Age at maturity  | -0.728    | -0.550               | -0.417             | -0.275                | 0.000     |
|           | Size at maturity | 0.505     | 0.759                | 0.867              | 0.945                 | 1.000     |
|           | Adult growth     | 0.463     | 0.350                | 0.267              | 0.175                 | 0.000     |



Supplementary table 8. Tests for differences in angle between the predicted response to selection ( $\Delta z$ ) in the fish and midge cue treatment. The comparisons relates to selection gradients ( $\beta$ ) with different weighting of reproductive and survival selection. Angle is expressed as the posterior mode with 95% confidence interval.

| Selection response test                           | Angle                     | p      |
|---------------------------------------------------|---------------------------|--------|
| fish vs. midge: $\Delta z_{\beta(R)}$             | 48.92° (11.59°-89.35°)    | 0.062  |
| fish vs. midge: $\Delta z_{\beta(R)+0.5\beta(S)}$ | 77.69° (35.43°-118.70°)   | <0.001 |
| fish vs. midge: $\Delta z_{\beta(R)+\beta(S)}$    | 99.39° (51.61°-133.39°)   | <0.001 |
| fish vs. midge: $\Delta z_{0.5\beta(R)+\beta(S)}$ | 107.06° (66.47°-149.00°)  | <0.001 |
| fish vs. midge: $\Delta z_{\beta(S)}$             | 137.83° (100.38°-172.13°) | <0.001 |

Supplementary table 9. The response to selection ( $\Delta z$ ) using composite selection gradients based upon different weighting of reproduction ( $\beta_R$ ) and survival ( $\beta_S$ ) selection. The multivariate response to selection is partitioned into trait-specific direct (through genetic variance), indirect (through genetic covariance) and total (using all components of  $\mathbf{G}$ ) response in the fish and midge cue treatment. Posterior mode and the upper and lower bound of the 95% credibility interval are presented, and elements significantly different from zero are indicated by asterisks (\*).

### Fish

| Response                          | Trait         | Total response           | Direct selection         | Indirect selection       |
|-----------------------------------|---------------|--------------------------|--------------------------|--------------------------|
| $\Delta z_{\beta(R)}$             | Age maturity  | -0.421* (-1.188; -0.197) | -0.437* (-1.050; -0.156) | -0.056 (-0.228; 0.091)   |
| $\Delta z_{\beta(R)+0.5\beta(S)}$ | Age maturity  | -0.591* (-1.511; -0.230) | -0.417* (-1.165; -0.188) | -0.141 (-0.500; 0.056)   |
| $\Delta z_{\beta(R)+\beta(S)}$    | Age maturity  | -0.610* (-1.643; -0.267) | -0.405* (-1.032; -0.155) | -0.217 (-0.717; 0.046)   |
| $\Delta z_{0.5\beta(R)+\beta(S)}$ | Age maturity  | -0.362* (-1.217; -0.162) | -0.208* (-0.582; -0.094) | -0.176 (-0.734; 0.035)   |
| $\Delta z_{\beta(S)}$             | Age maturity  | -0.196 (-0.593; 0.028)   | 0.000 (0.000; 0.000)     | -0.196 (-0.593; 0.028)   |
| $\Delta z_{\beta(R)}$             | Size maturity | -0.138 (-0.498; 0.038)   | 0.174* (0.068; 0.345)    | -0.265* (-0.767; -0.100) |
| $\Delta z_{\beta(R)+0.5\beta(S)}$ | Size maturity | -0.309* (-0.879; -0.129) | -0.003* (-0.006; -0.001) | -0.303* (-0.873; -0.126) |
| $\Delta z_{\beta(R)+\beta(S)}$    | Size maturity | -0.409* (-1.087; -0.224) | -0.175* (-0.352; -0.073) | -0.259* (-0.754; -0.114) |
| $\Delta z_{0.5\beta(R)+\beta(S)}$ | Size maturity | -0.437* (-0.998; -0.199) | -0.270* (-0.602; -0.118) | -0.152* (-0.436; -0.063) |
| $\Delta z_{\beta(S)}$             | Size maturity | -0.353* (-0.700; -0.138) | -0.353* (-0.700; -0.138) | 0.000 (0.000; 0.000)     |
| $\Delta z_{\beta(R)}$             | Adult growth  | 0.415* (0.122; 0.932)    | 0.350* (0.175; 0.813)    | 0.004 (-0.275; 0.295)    |
| $\Delta z_{\beta(R)+0.5\beta(S)}$ | Adult growth  | 0.732* (0.252; 1.461)    | 0.404* (0.191; 0.915)    | 0.230 (-0.068; 0.638)    |
| $\Delta z_{\beta(R)+\beta(S)}$    | Adult growth  | 0.895* (0.313; 1.625)    | 0.351* (0.174; 0.789)    | 0.382* (0.082; 0.923)    |
| $\Delta z_{0.5\beta(R)+\beta(S)}$ | Adult growth  | 0.580* (0.246; 1.377)    | 0.202* (0.096; 0.458)    | 0.411* (0.132; 0.961)    |
| $\Delta z_{\beta(S)}$             | Adult growth  | 0.329* (0.131; 0.843)    | 0.000 (0.000; 0.000)     | 0.329* (0.131; 0.843)    |

**Midge**

| Response                          | Trait         | Total response           | Direct selection         | Indirect selection     |
|-----------------------------------|---------------|--------------------------|--------------------------|------------------------|
| $\Delta z_{\beta(R)}$             | Age maturity  | -0.123 (-0.538; 0.003)   | -0.116* (-0.538; -0.000) | 0.008 (-0.081; 0.090)  |
| $\Delta z_{\beta(R)+0.5\beta(S)}$ | Age maturity  | -0.168 (-0.430; 0.007)   | -0.117* (-0.406; -0.000) | -0.030 (-0.115; 0.074) |
| $\Delta z_{\beta(R)+\beta(S)}$    | Age maturity  | -0.118* (-0.373; -0.001) | -0.071* (-0.308; -0.000) | -0.038 (-0.163; 0.078) |
| $\Delta z_{0.5\beta(R)+\beta(S)}$ | Age maturity  | -0.117 (-0.326; 0.007)   | -0.058* (-0.213; -0.000) | -0.46 (-0.191; 0.076)  |
| $\Delta z_{\beta(S)}$             | Age maturity  | -0.039 (-0.249; 0.103)   | 0.000 (0.000; 0.000)     | -0.039 (-0.249; 0.103) |
| $\Delta z_{\beta(R)}$             | Size maturity | 0.065 (-0.044; 0.256)    | 0.059* (0.000; 0.250)    | 0.004 (-0.185; 0.110)  |
| $\Delta z_{\beta(R)+0.5\beta(S)}$ | Size maturity | 0.129* (0.005; 0.345)    | 0.091* (0.005; 0.373)    | -0.003 (-0.141; 0.086) |
| $\Delta z_{\beta(R)+\beta(S)}$    | Size maturity | 0.104 (-0.006; 0.391)    | 0.102* (0.000; 0.430)    | 0.000 (-0.107; 0.064)  |
| $\Delta z_{0.5\beta(R)+\beta(S)}$ | Size maturity | 0.106* (0.022; 0.452)    | 0.114* (0.007; 0.465)    | -0.002 (-0.070; 0.043) |
| $\Delta z_{\beta(S)}$             | Size maturity | 0.117* (0.000; 0.494)    | 0.117* (0.000; 0.494)    | 0.000 (0.000; 0.000)   |
| $\Delta z_{\beta(R)}$             | Adult growth  | 0.037 (-0.137; 0.286)    | 0.177* (0.063; 0.402)    | -0.074 (-0.393; 0.039) |
| $\Delta z_{\beta(R)+0.5\beta(S)}$ | Adult growth  | -0.005 (-0.252; 0.149)   | 0.110* (0.048; 0.299)    | -0.125 (-0.456; 0.027) |
| $\Delta z_{\beta(R)+\beta(S)}$    | Adult growth  | -0.041 (-0.309; 0.104)   | 0.084* (0.036; 0.236)    | -0.135 (-0.484; 0.017) |
| $\Delta z_{0.5\beta(R)+\beta(S)}$ | Adult growth  | -0.074 (-0.366; 0.071)   | 0.055* (0.024; 0.150)    | -0.117 (-0.501; 0.002) |
| $\Delta z_{\beta(S)}$             | Adult growth  | -0.139 (-0.469; 0.024)   | 0.000 (0.000; 0.000)     | -0.139 (-0.469; 0.024) |

Supplementary table 10. Validating the power to detect mis-alignment. Tests for alignment between the plasticity vector induced by the opposite predator cue treatment, the direction of maximum genetic variation ( $g_{\max}$ ) and the response to selection on reproduction ( $\Delta z_R$ ), survival ( $\Delta z_S$ ) or reproduction and survival combined. Angle is expressed as the posterior mode with 95% confidence interval. Significant angles indicate mis-alignment.

| Comparison                                                           | Angle                     | p      | Alignment |
|----------------------------------------------------------------------|---------------------------|--------|-----------|
| Plasticity <sub>midge</sub> , $g_{\max}$ fish                        | 92.90° (56.15°-135.10°)   | 0.169  | yes       |
| Plasticity <sub>midge</sub> , $\Delta z_{\beta(R)}$ fish             | 90.61° (61.37°-131.07°)   | <0.001 | -         |
| Plasticity <sub>midge</sub> , $\Delta z_{\beta(R)+0.5\beta(S)}$ fish | 90.16° (67.57°-133.39°)   | <0.001 | -         |
| Plasticity <sub>midge</sub> , $\Delta z_{\beta(R)+\beta(S)}$ fish    | 100.54° (70.12°-136.65°)  | <0.001 | -         |
| Plasticity <sub>midge</sub> , $\Delta z_{0.5\beta(R)+\beta(S)}$ fish | 102.79° (73.52°-142.00°)  | <0.001 | -         |
| Plasticity <sub>midge</sub> , $\Delta z_{\beta(S)}$ fish             | 116.96° (77.39°-148.76°)  | <0.001 | -         |
| Plasticity <sub>fish</sub> , $g_{\max}$ midge                        | 61.02° (19.43°-118.04°)   | 0.084  | yes       |
| Plasticity <sub>fish</sub> , $\Delta z_{\beta(S)}$ midge             | 104.94° (56.59°-152.52°)  | <0.001 | -         |
| Plasticity <sub>fish</sub> , $\Delta z_{\beta(R)+0.5\beta(S)}$ midge | 122.51° (75.87°-166.28°)  | <0.001 | -         |
| Plasticity <sub>fish</sub> , $\Delta z_{\beta(R)+\beta(S)}$ midge    | 131.96° (81.83°-170.56°)  | 0.001  | -         |
| Plasticity <sub>fish</sub> , $\Delta z_{0.5\beta(R)+\beta(S)}$ midge | 141.62° (92.57°-171.72°)  | <0.001 | -         |
| Plasticity <sub>fish</sub> , $\Delta z_{\beta(S)}$ midge             | 147.70° (103.59°-174.65°) | <0.001 | -         |

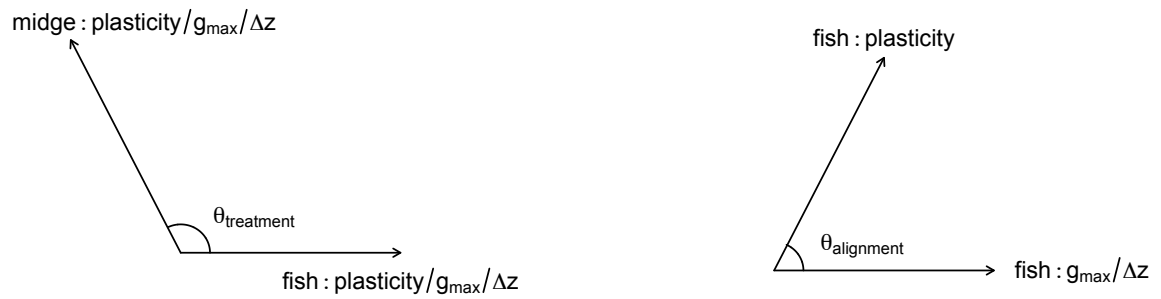

Supplementary figure 1. Specific hypothesis tested and their interpretation.

| Angle comparison                                                         | Interpretation                                                                                  |
|--------------------------------------------------------------------------|-------------------------------------------------------------------------------------------------|
| $\text{plasticity}_{\text{fish}}$ vs. $\text{plasticity}_{\text{midge}}$ | Difference in the direction of plastic trait induction between treatments                       |
| $g_{\text{max}}(\text{fish})$ vs. $g_{\text{max}}(\text{midge})$         | Difference in the direction of maximum genetic variance between treatments                      |
| $\beta_{R/S}(\text{fish})$ vs. $\beta_{R/S}(\text{midge})$               | Difference in selection gradient (reproduction /survival) between treatments                    |
| $\Delta Z_{R/S}(\text{fish})$ vs. $\Delta Z_{R/S}(\text{midge})$         | Difference in the predicted response to selection between treatments                            |
| $g_{\text{max}}$ vs. plasticity                                          | Alignment between $g_{\text{max}}$ and plasticity in each predator treatment                    |
| $\Delta Z_{R/S}$ vs. plasticity                                          | Alignment between the predicted response to selection and plasticity in each predator treatment |

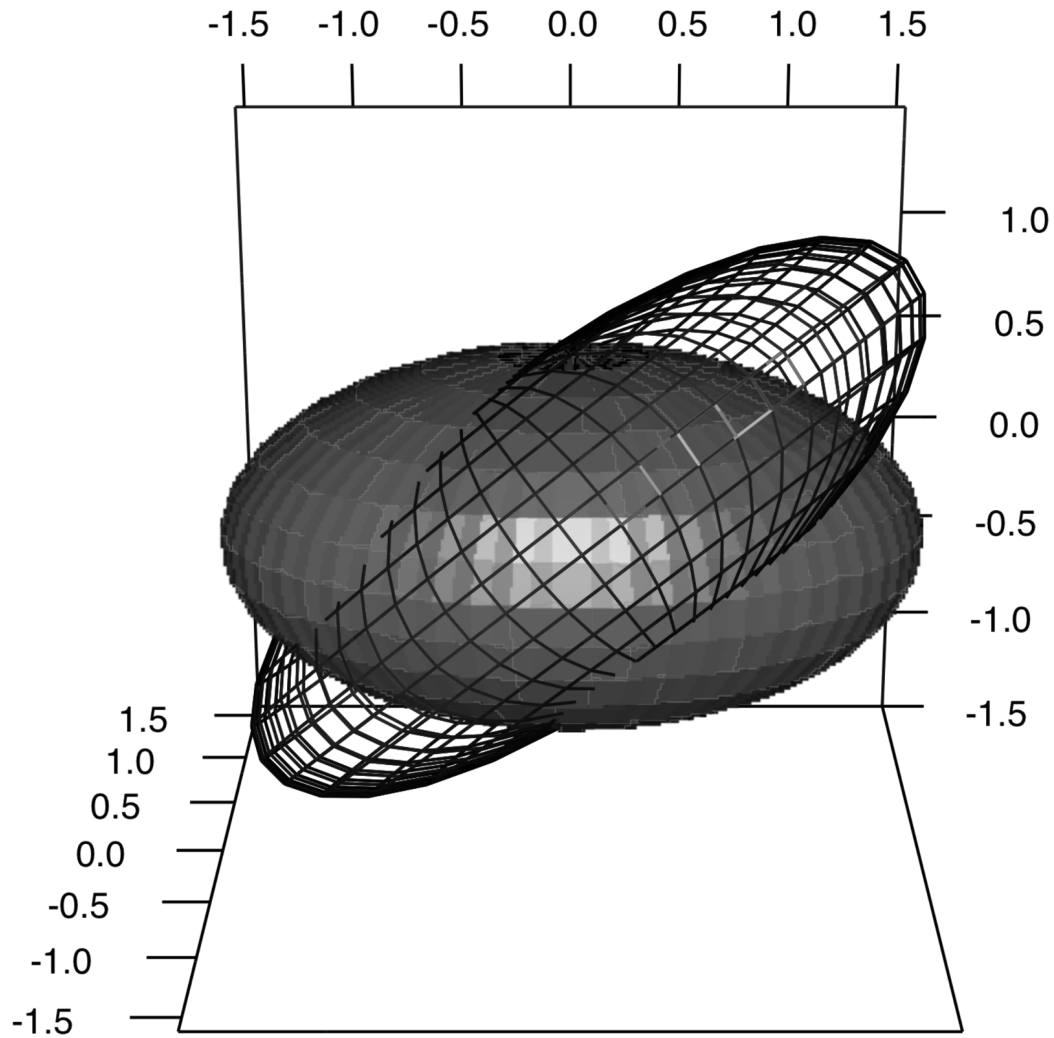

Supplementary figure 2. Three-dimensional ellipsoids representing the first three eigenvectors of the genetic variance-covariance matrices in the midge (grey, solid surface) and fish (black, wireframe) cue treatment.

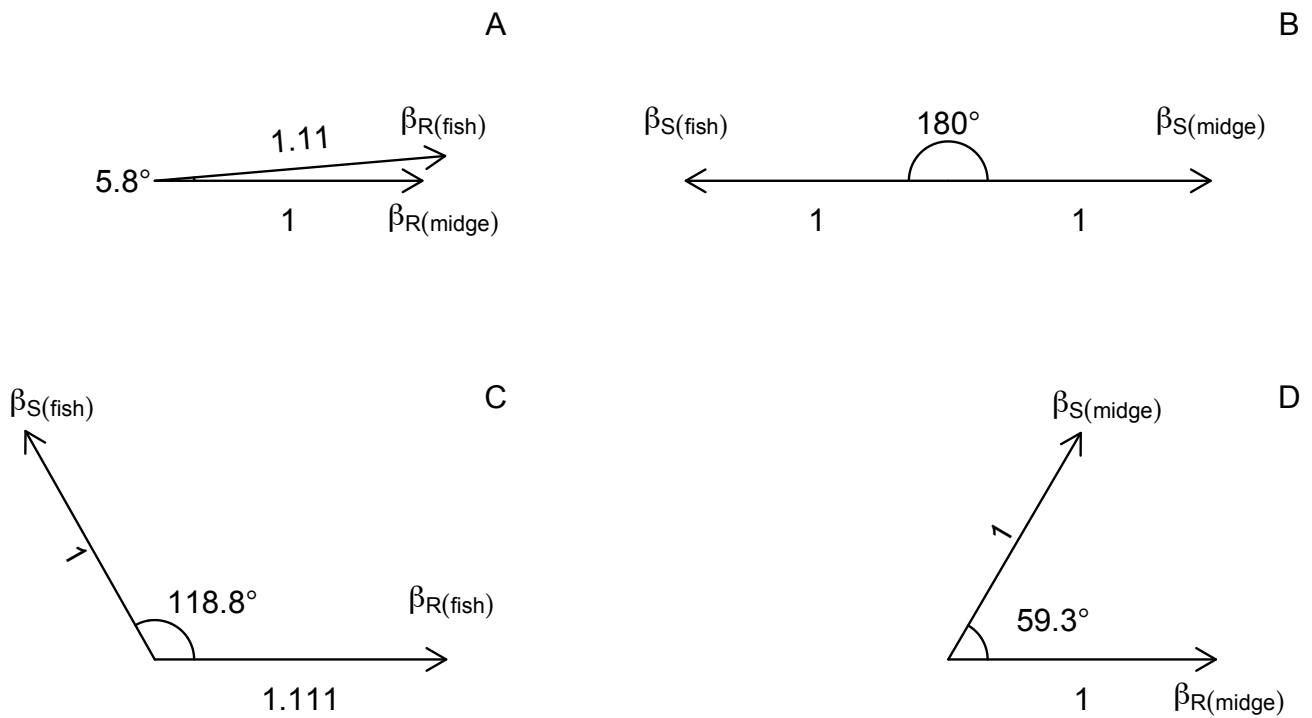

Supplementary figure 3. The difference in magnitude and orientation of the vector of the linear selection gradient ( $\beta$ ) visualised in two-dimensional space when comparing (A) reproduction or (B) survival in the midge and fish treatment. The difference in angle between  $\beta$  in reproduction and survival is presented separately for (C) the fish and (D) the midge cue treatment. The length of each vector illustrates the total strength of selection.

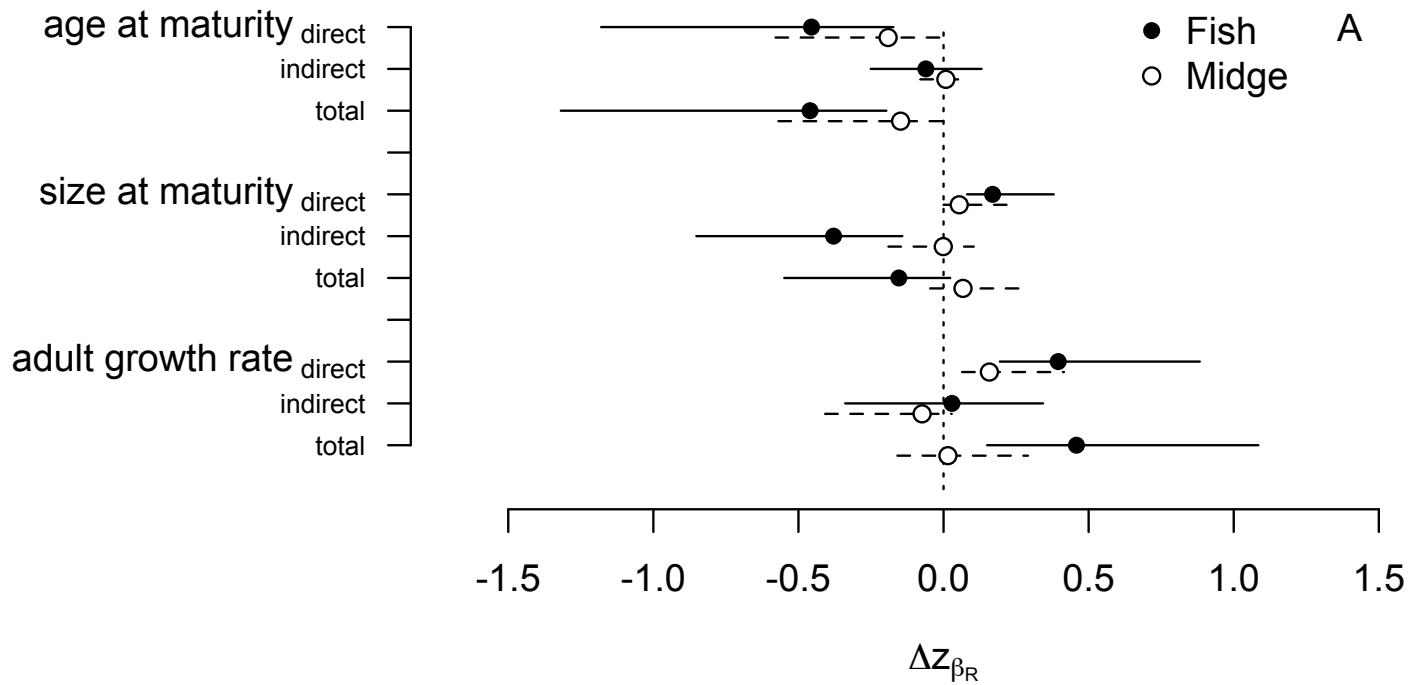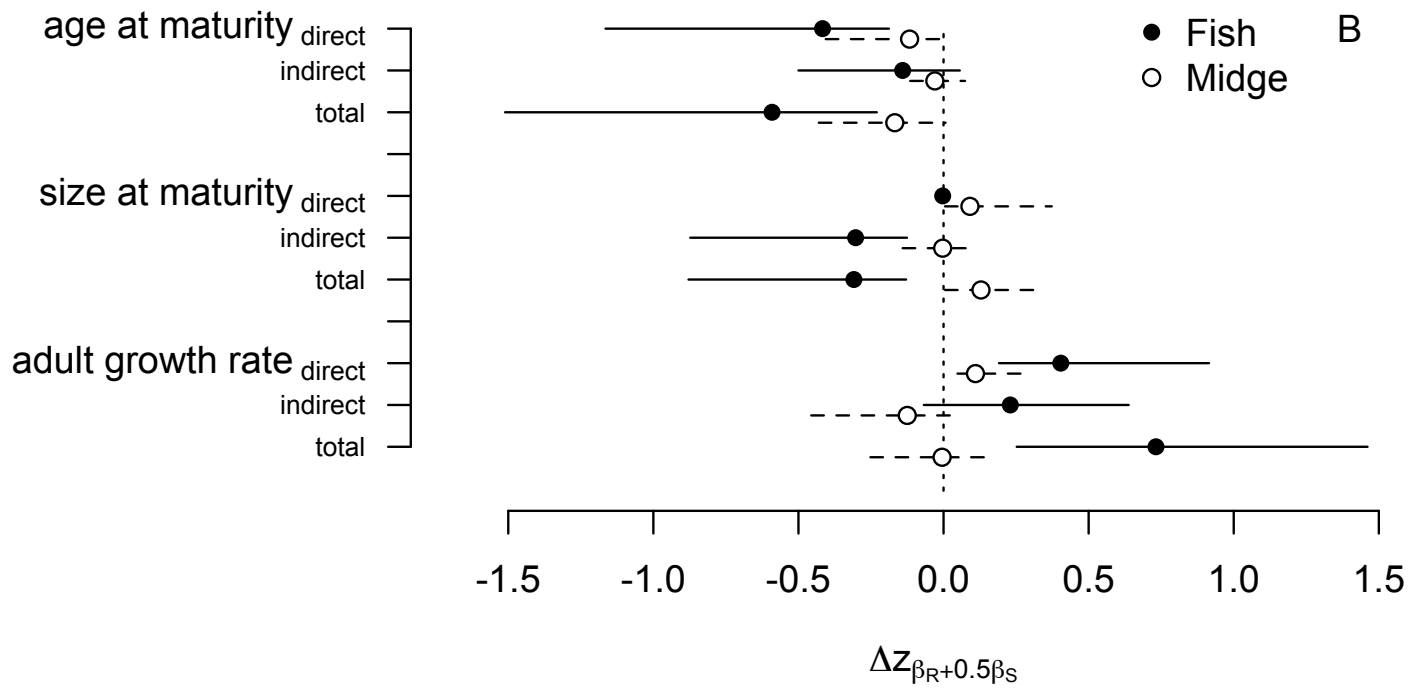



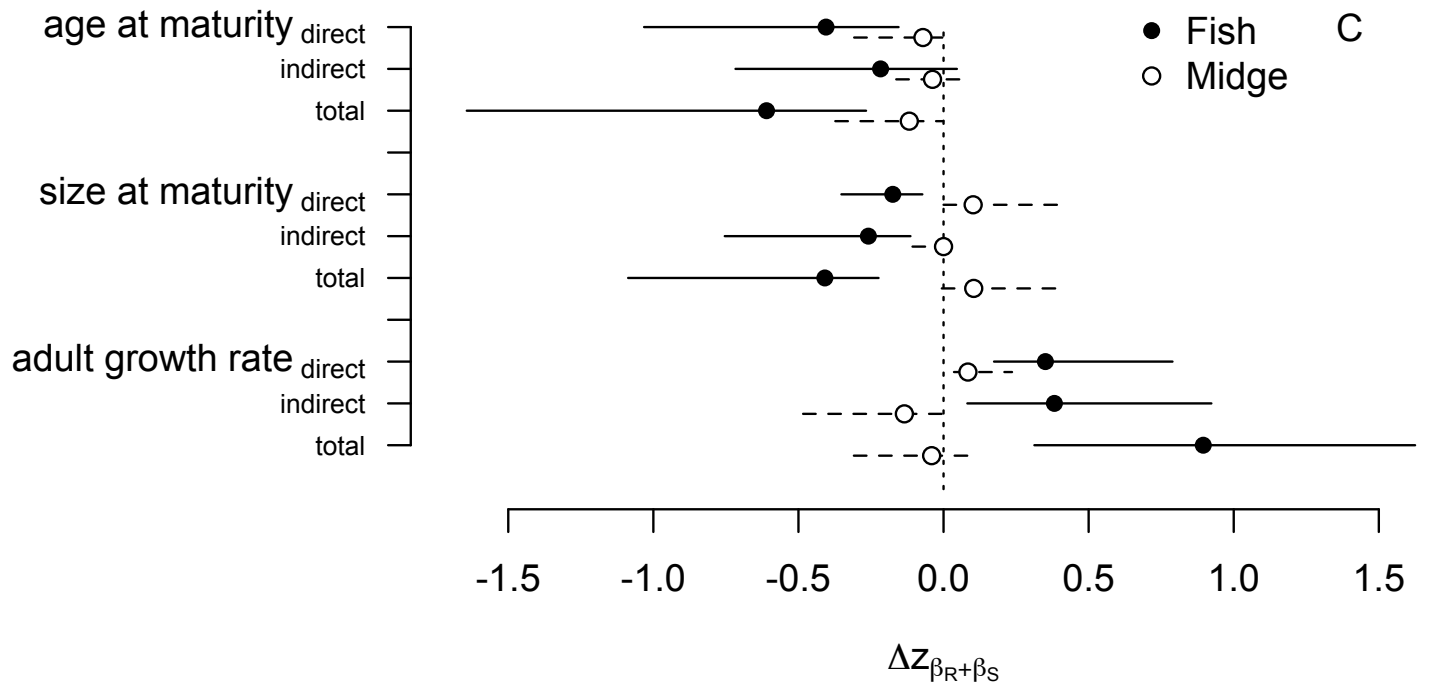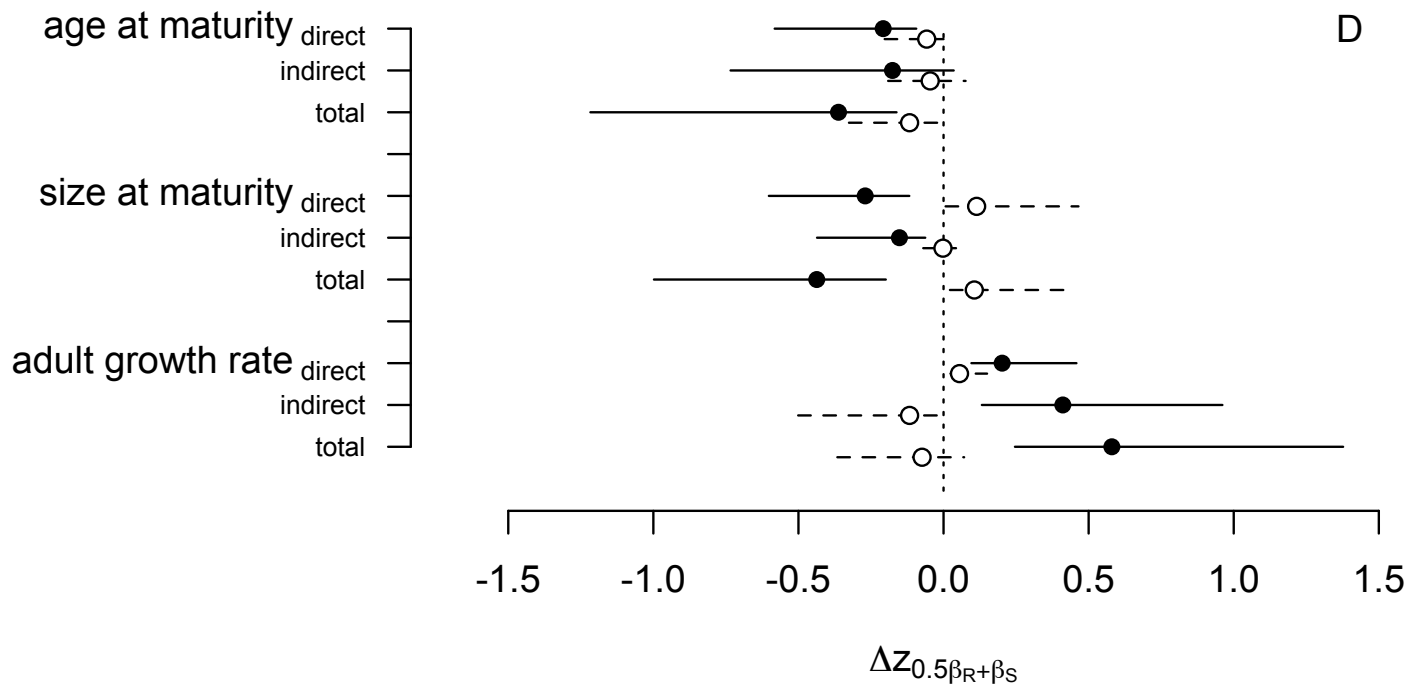

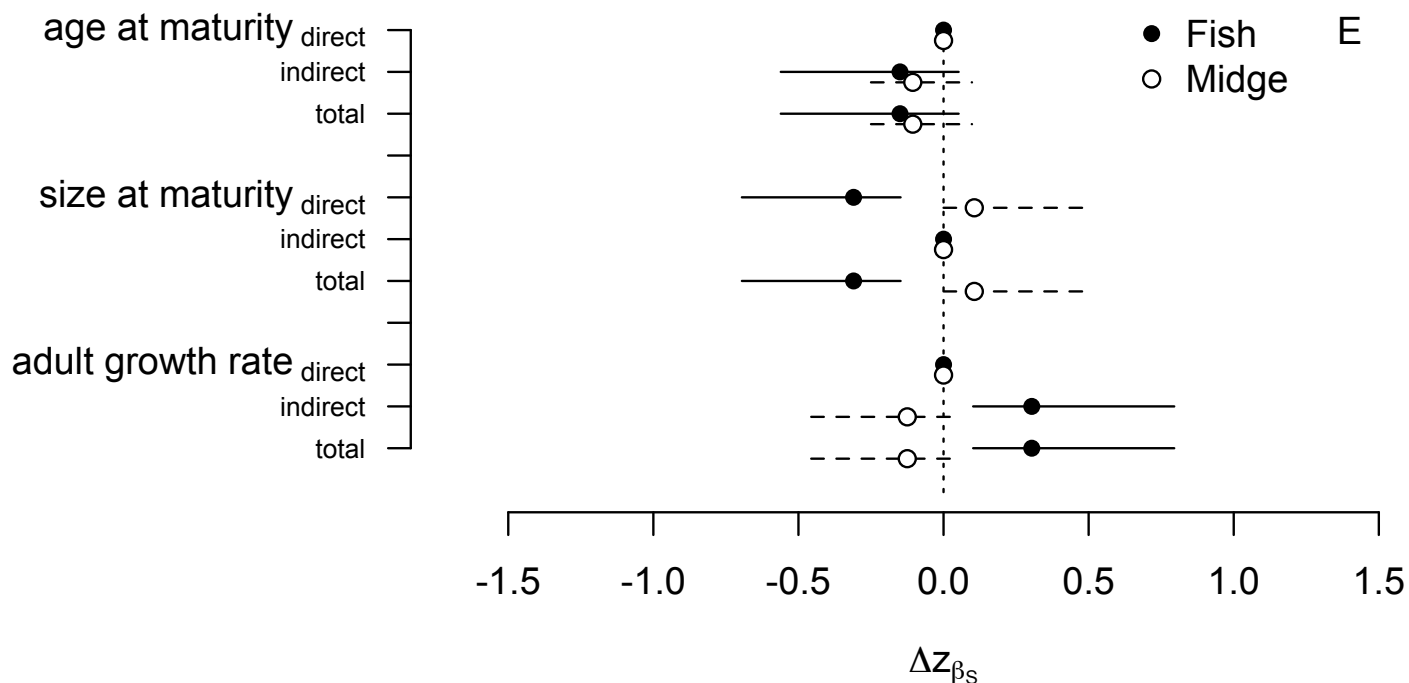

Supplementary figure 4. The predicted response to selection ( $\Delta z$ ) using selection based on different combinations of reproductive and survival selection. The multivariate response to selection is partitioned into trait-specific direct (through genetic variance), indirect (through genetic covariance) and total (using all components of G) response to selection in the fish (black circles, solid lines) and midge (white circles, jagged lines) cue treatment. The horizontal lines correspond to the 95% HPD interval.
